# Supplementary material
Source: publisher site journal article supplement (https://www.dovepress.com/article/406987)
Supplement: Supplementary file 1 [file get_supplementary_file.php]

Table S1 Chinese college graduates’ negative life experience.

| Theme | Subtheme | | Numbers mentioned | Representative quote |
| --- | --- | --- | --- | --- |
| Negative work experience | Lack of adaptation to work |  | 9 | “My work experience is very limited, and I need to grow from a student who knows nothing to a qualified worker, during this time I need to learn a lot, and the job requires me to adapt to it in a very short period of time.” (P27) |
|  |  |  | “What I find most difficult to adapt to may be the workplace culture, such as how to get along with colleagues in the company, what I need to pay attention to and how to deal with leaders...” (P7) |
| Failing the exam |  | 7 | “A poor score in an exam will lead to emotional instability and fragile heart...” (P25) |
|  |  |  | “...I have experienced failure by a few points many times, I will doubt whether my choice is worth sticking to.” (P22) |
| Busy work |  | 4 | “... I may come back at 3 or 4 am, and then I have to go on a business trip to court at 9:30 the next morning...” (P3) |
| Confusion and loss at work |  | 4 | “...the staff felt that they were not interested in me, and I felt that the department no longer needed me...” (P17) |
| Low salary |  | 2 | “It's the low salary in my present job that makes me doubt myself.” (P15) |
| The instability of work |  | 1 | “What I am not satisfied with is that I have not found a stable job, which is different from what I expected.” (P17) |
| Work takes over my life |  | 1 | “Work takes up most of my life. Then, when I am working, I will have a feeling that my life is gone, and I can barely spend time with my family and friends...” (P27) |

Cont. Table S1

| Theme | Subtheme | | Numbers mentioned | Representative quote |
| --- | --- | --- | --- | --- |
| Negative personal life experience | Multiple pressure | Economic stress | 17 | “... I always want to have a stable economic income to support my family, but the truth is that after graduation, I still need support from my family.” (P23) |
|  |  | “...1300 Yuan a month, so I keep overdrawing on rent and living, which leads to more and more debt.” (P7) |
| Work stress | 10 | “I have a lot of work to do every day, and often this one isn't done yet, and there are several other deadlines that need to be done...” (P24) |
|  |  | “If you make a mistake at school, you can correct it, but if you make a mistake at work, you will not only correct it, but you will also be punished...” (P26) |
| Exam pressure | 8 | “I was worried that my family would be criticized by my relatives ...”(P10) |
|  |  | “The influence of external and internal factors makes it very stressful to prepare for the exam...”(P25) |
| Peer stress | 7 | “Many of my friends had their own jobs and lives, ... I experienced failure again and again.” (P28) |
|  |  | “I always unconsciously compared myself with other classmates in the same period, and I found that I was inferior to others in almost everything.” (P23) |
| Employment stress | 6 | “...many people want to have a stable job during the COVID-19 pandemic, ...resulting in increasingly fierce competition for these positions.” (P25) |
| The stress of multiple choices | 4 | “My stress is reflected in some choices at the fork in the road...” (P7) |
| Family stress | 2 | “As my parents are getting old, I have more and more responsibilities to take on” (P25) |

Cont. Table S1

| Theme | Subtheme | | Numbers mentioned | Representative quote |
| --- | --- | --- | --- | --- |
| Negative personal life experience | Psychological problems |  | 8 | “Before I found a job, I was very anxious at home...” (P13) |
|  |  |  | “After I start my work, the daily workload is very heavy, and there is not enough time to finish, so I am very stressed out.” (P6) |
| The hardship of life |  | 6 | “...I experienced all kinds of pressure, blows, and rejection everywhere. I lived two completely different lives, from carefree school life to cruel social life.”(P26) |
| The weariness of life |  | 3 | “I often work beyond working hours without extra pay... long hours of overtime and various kinds of work pressure will put a person in a state of exhaustion.” (P8) |
| Dissatisfaction with myself |  | 3 | “Some of my close friends have gone to school, ...while I stay at home, I feel sad, and have been living in regret.” (P11) |
| Boredom of life |  | 2 | “My life experience in this year after graduation is rather boring, and I feel that I have no motivation.” (P6) |
| Loneliness |  | 1 | “…I felt a little lonely. People around me were studying and working...” (P24) |
| Negative social life experience | The incomprehension of those around you |  | 8 | “When I was at home preparing for exams, some friends and relatives who didn't understand me would say a lot of very sensitive words, which made me feel very sad and uncomfortable.” (P10) |
| Complex interpersonal relationship |  | 6 | “At school, the relationship with teachers and classmates was completely different from that with leaders and colleagues, ...I was not good at dealing with interpersonal relationships at work.” (P22) |
| Receiving negative energy from other people |  | 3 | “Some people were pessimistic and pass that negativity to me, which sometimes makes me struggle with right and wrong for a few days.” (P12) |
| Social complexity |  | 1 | “One thing I realize after I enter the society is that campus life is really beautiful and simple, and the society is really complicated.” (P16) |
| Difficulty in social integration |  | 1 | “I didn't fit in my job or the social circles of my colleagues, which led to my negative experience.” (P17) |

Table S2 Chinese college graduates’ coping strategies with negative life experiences.

| **Theme** | **Subtheme** | **Numbers mentioned** | **Representative quote** |
| --- | --- | --- | --- |
| Emotion-focused coping strategies | Accept the reality | 10 | “My main coping style is to do more, think less, get on with the present, and compare less.” (P13) |
|  |  | “The exam results are not ideal, which means I am not working hard enough, so I must study hard.” (P5) |
| Keep a positive attitude | 4 | “I am resilient to negative life experience. I will treat the negative experience as inspiration, and turn negative life experience into a positive experience.” (P31） |
| Change perspective | 3 | “When conflicts occurred, I slowly think back, in fact, nothing happened, as long as I stand in the perspective of others to think, and I show a good attitude, the conflicts can be basically solved.” (P5) |
| Compromise and escape | 1 | “The ultimate solution to a job search is to compromise. When I can't face family issues, I try to escape first. Now I really can't face it.”(P12) |
| Talk to someone | 8 | “I will communicate with like-minded and positive friends, talk about life principles and plans, learn and encourage each other.” (P13) |
| Self-persuasion | 8 | “Every time I feel more negative emotions, I will self-channel and think more deeply to interpret the negative experiences beyond the phenomenon and see the essence.”(P24) |
|  |  | “As long as I study harder, build self-confidence, learn from every failure, I will succeed.” (P22) |

Cont. Table S2

| **Theme** | **Subtheme** | **Numbers mentioned** | **Representative quote** |
| --- | --- | --- | --- |
| Emotion-focused coping strategies | Do what I like | 5 | “I am an amateur badminton player, sports bring me a lot of pleasure, after a lot of sweat, I feel relieved from life pressure.” (P8) |
|  |  | “I will empty myself to nature, even when I am busy, I will take time to go, enjoy the feeling of being surrounded by green, I don't have to think about anything, I can let my mood calm down and think well.” (P27)  “Choose a gourmet meal such as a delicious dinner. ”(P27) |
|  |  | “I will clean my room and put everything in order.” (P27) |
| Problem-focused coping strategies | Goal-setting | 5 | “I set a long-term plan and I'm working towards that.” (P31) |
|  |  | “I will give myself a psychological hint, I must believe in myself that I will achieve the goals I set.” (P10) |
| Ask for help to solve problem | 3 | “...I will find friends who are better than me to get some solutions. I will try to overcome my own shortcomings and learn from others so that I can prepare for my next exam with better performance.” (P25) |
| Persistence | 5 | “...I can only grit my teeth to stick to it, it is not easy to find a job in the current job market, what I can do is to stick.” (P30) |

Table S3 Chinese college graduates’ Enlightenment for life.

| Theme | Subtheme | Numbers mentioned | Representative quote |
| --- | --- | --- | --- |
| Accept life |  | 11 | “This year, although my life is not so ideal, nor is it so exquisite, in general, I feel OK, at least I did not let myself go hungry, when I look at those uncles and aunts in their thirties and forties who are crowded in the bus every day, I feel good when compared with them.” (P5) |
|
| “A simple summary is to learn to grow up in the bump and bump, and constantly understand the meaning of life in the accumulation. No matter good or bad, it is what we should experience. Every step of the road counts.” (P7) |
|
| Strive for life |  | 8 | “The biggest inspiration from the life of the year after graduation is that I will have firm faith in the future, work hard, and not relax. Excessive relaxation will only make me lazy and don't want to do anything. Therefore, in the future, I will devote my utmost energy to study, find a satisfactory job and return to my family.” (28) |
|
|
|
|
| “I have worked very hard at school and won all kinds of certificates and scholarships, so my resume is better than other students. I was lucky that I didn't have much trouble finding a job.” (P7) |
| Love life |  | 6 | “The short-term of life may not be ideal, but the future is still smooth. Don't be swayed by considerations of temporary gains and losses. Always have love and passion in life.” (P29) |
| “I am a person who loves life. Even if I encounter some bad things, I will turn it into a good one.” (P31) |
|
| Cherish life |  | 4 | “I didn't know how to cherish high school and college life, now I start to cherish the current young energy and hard work.” (P13) |
| “Life is fragile, cherish the people you love, we don't know what will happen tomorrow, we don't care too much about trivial things.” (P21) |

Cont. Table S3

| Theme | Subtheme | Numbers mentioned | Representative quote |
| --- | --- | --- | --- |
| Recognize life | The difference between society and school | 11 | “In school, I can do nothing, but in work, I have to think about how to support my family, how to find a girlfriend, and deal with all kinds of life inconveniences.” (P21) |
| “...In school, there are people who teach us and lead us to learn, but in work, everything depends on ourselves, although the people in the department will teach us, everyone has their own job...” (P9) |
| A gap between ideal and reality | 6 | “It's not exactly what I expected. I expected to work in a good company with a good income, but the real situation is that the salary of the company is very low...” (P12) |
| “...it should not be difficult for me to find a job. If I work in a hospital, I should also like it, and the salary should not be low. After graduation, I found a big gap.” (P17) |
| Difficulty to find a satisfactory job | 4 | “In fact, it is not difficult to find a job, but it is difficult to find a company that you like, want to work and match your expertise.” (P2) |
|
| “After graduation, I understand that only when I am excellent can I have a good job...” (P5) |
| Fierce competition in the job market | 3 | “In recent years, a large number of people have participated in the preliminary examination to compete for a job position, and the average enrollment ratio is basically 1:100+...” (P5) |
| Pain and happiness | 2 | “Life is painful and happy.” (P10) |
| “Life is a mixture of joys and sorrows.” (P21) |

Cont. Table S3

| Theme | Subtheme | Numbers mentioned | Representative quote |
| --- | --- | --- | --- |
| Learn to live | Learn to social | 5 | “Dealing with people is also a very important lesson. Sometimes "what you can do" is not as good as "what you can say". If you can't get along with people, you may be eliminated.” (P26) |
|
|
| Learn to learn | 3 | “Learning ability is important. What we learn in school is different from what we encounter when we come out to work, so we have to learn to learn.” (P2) |
|
| Learn to adapt to society | 3 | “The environment will not change to adapt to you, so you need to change yourself to adapt to the environment...” (P6) |
|
| Learn to improve yourself | 3 | “This year's work and life experience tells me that only by constantly improving myself can I meet better people, achieve what I want, and see the big world that I have never seen.” (P31) |
| Learn to regulate your emotions | 1 | “We should know how to relax ourselves and regulate our emotions.” (P30) |
| Learn to be independent | 1 | “In life, we should learn to be independent, we should have the idea that everything can be done by ourselves, we should not rely on others.” (P30) |
| Learn to keep healthy | 1 | “We must keep a healthy body, do more exercise, no matter how busy we are, we must do more exercise, this is a very important point.” (P27) |
